# Supplementary material for: Cytotoxic neolignans from the traditional Chinese medicine Daphniphyllum macropodum Miq.
Source: Royal Society of Chemistry journal article supplement (doi:10.1039/c7ra09569d), 2017-01-01

## **Cytotoxic neolignans from the traditional Chinese medicine**

### ***Daphniphyllum macropodum* Miq.**

Xinhua Ma<sup>a,1</sup>, Jie Yang<sup>a,1</sup>, Chris L. Brown<sup>b</sup>, Chao Wang<sup>b</sup>, Shihao Deng<sup>a</sup>, Ruifang Ke<sup>a</sup>,  
Shicheng Xu<sup>a</sup>, Mi Huang<sup>a</sup>, Xinzhou Yang<sup>a,\*</sup>, Yunjiang Feng<sup>b,\*</sup>

<sup>a</sup>*School of Pharmaceutical Sciences, South-Central University for Nationalities, Wuhan 430074, China.*

<sup>b</sup>*Griffith Institute for Drug Discovery, School of Natural Sciences, Griffith University, Brisbane, QLD 4111, Australia*

*E-mail: xzyang@mail.scuec.edu.cn (X.Z. Yang); Fax: +86-27-67841196; Tel: +86-27-67841196*

*E-mail: y.feng@griffith.edu.au (Y. Feng); Fax: +61-7-37356000; Tel: +61-7-37358367.*

<sup>1</sup>*Both authors contributed equally to this paper.*

## Supporting Information

| <b>Fingue</b>                                                                            | <b>page No.</b> |
|------------------------------------------------------------------------------------------|-----------------|
| <b>Figure S1</b> HRESIMS spectrum of <b>1</b>                                            | 4               |
| <b>Figure S2</b> <sup>1</sup> H NMR spectrum (600 MHz, CD <sub>3</sub> OD) of <b>1</b>   | 4               |
| <b>Fingue S3</b> <sup>13</sup> C NMR spectrum (150 MHz, CD <sub>3</sub> OD) of <b>1</b>  | 5               |
| <b>Figure S4</b> HSQC spectrum of <b>1</b>                                               | 5               |
| <b>Figure S5</b> COSY spectrum of <b>1</b>                                               | 6               |
| <b>Figure S6</b> HMBC spectrum of <b>1</b>                                               | 7               |
| <b>Figure S7</b> IR spectrum of <b>1</b>                                                 | 7               |
| <b>Figure S8</b> UV spectrum of <b>1</b>                                                 | 8               |
| <b>Figure S9</b> HRESIMS spectrum of <b>2</b>                                            | 8               |
| <b>Figure S10</b> <sup>1</sup> H NMR spectrum (600 MHz, CD <sub>3</sub> OD) of <b>2</b>  | 9               |
| <b>Fingue S11</b> <sup>13</sup> C NMR spectrum (150 MHz, CD <sub>3</sub> OD) of <b>2</b> | 9               |
| <b>Figure S12</b> HSQC spectrum of <b>2</b>                                              | 10              |
| <b>Figure S13</b> COSY spectrum of <b>2</b>                                              | 11              |
| <b>Figure S14</b> HMBC spectrum of <b>2</b>                                              | 12              |
| <b>Figure S15</b> IR spectrum of <b>2</b>                                                | 12              |
| <b>Figure S16</b> UV spectrum of <b>2</b>                                                | 13              |
| <b>Figure S17</b> HRESIMS spectrum of <b>3</b>                                           | 13              |
| <b>Figure S18</b> <sup>1</sup> H NMR spectrum (600 MHz, CD <sub>3</sub> OD) of <b>3</b>  | 14              |
| <b>Fingue S19</b> <sup>13</sup> C NMR spectrum (150 MHz, CD <sub>3</sub> OD) of <b>3</b> | 14              |
| <b>Figure S20</b> HSQC spectrum of <b>3</b>                                              | 15              |
| <b>Figure S21</b> COSY spectrum of <b>3</b>                                              | 16              |
| <b>Figure S22</b> HMBC spectrum of <b>3</b>                                              | 17              |
| <b>Figure S23</b> IR spectrum of <b>3</b>                                                | 17              |
| <b>Figure S24</b> UV spectrum of <b>3</b>                                                | 18              |
| <b>Figure S25</b> HRESIMS spectrum of <b>4</b>                                           | 18              |
| <b>Figure S26</b> <sup>1</sup> H NMR spectrum (600 MHz, CD <sub>3</sub> OD) of <b>4</b>  | 19              |

|                                                                                               |    |
|-----------------------------------------------------------------------------------------------|----|
| <b>Figure S27</b> $^{13}\text{C}$ NMR spectrum (150 MHz, $\text{CD}_3\text{OD}$ ) of <b>4</b> | 19 |
| <b>Figure S28</b> HSQC spectrum of <b>4</b>                                                   | 20 |
| <b>Figure S29</b> COSY spectrum of <b>4</b>                                                   | 21 |
| <b>Figure S30</b> HMBC spectrum of <b>4</b>                                                   | 22 |
| <b>Figure S31</b> IR spectrum of <b>4</b>                                                     | 22 |
| <b>Figure S32</b> UV spectrum of <b>4</b>                                                     | 23 |
| <b>Figure S33</b> HPLC chromatogram of <b>1</b>                                               | 23 |
| <b>Figure S34</b> HPLC chromatogram of <b>2</b>                                               | 24 |
| <b>Figure S35</b> HPLC chromatogram of <b>3</b>                                               | 24 |
| <b>Figure S36</b> HPLC chromatogram of <b>4</b>                                               | 25 |

Figure S1 HRESIMS spectrum of 1

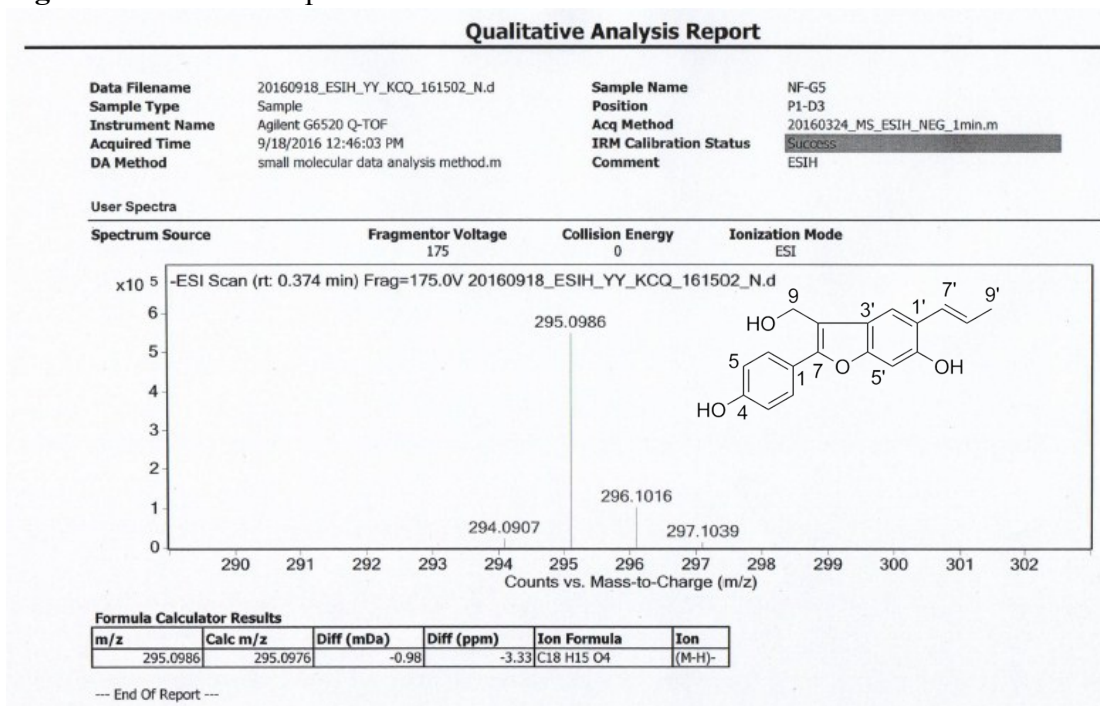

Figure S2 <sup>1</sup>H NMR spectrum (600 MHz, CD<sub>3</sub>OD) of 1

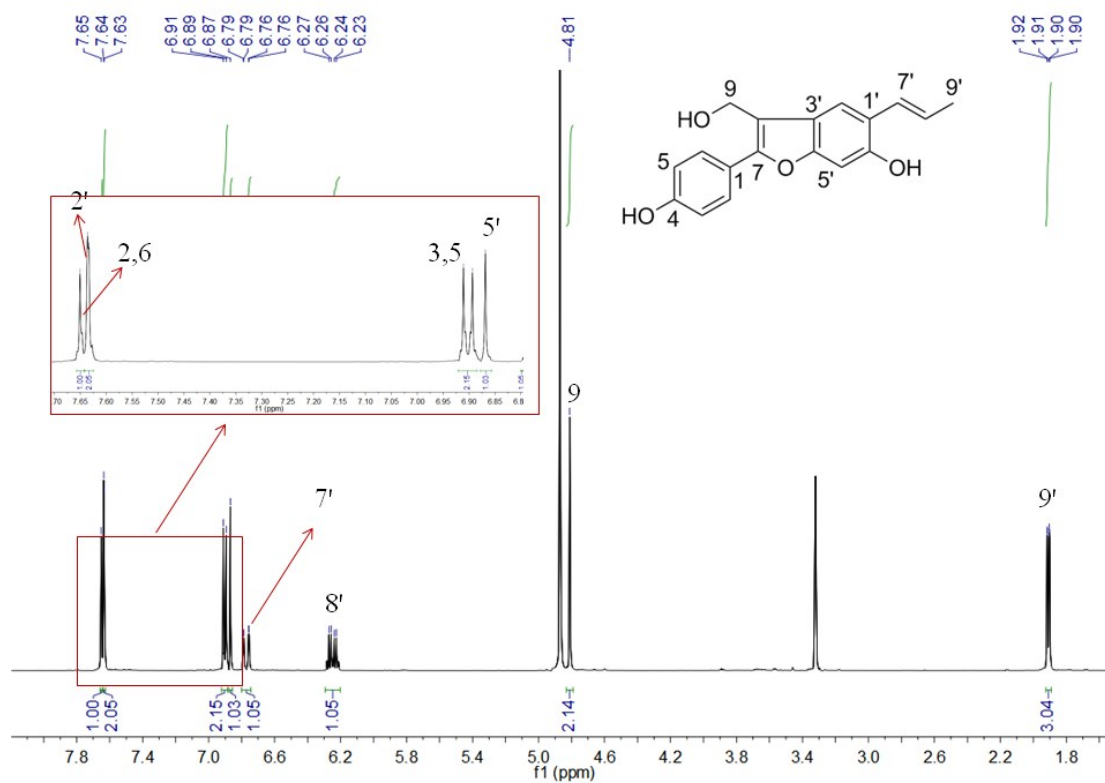

**Figure S3**  $^{13}\text{C}$  NMR spectrum (150 MHz,  $\text{CD}_3\text{OD}$ ) of **1**

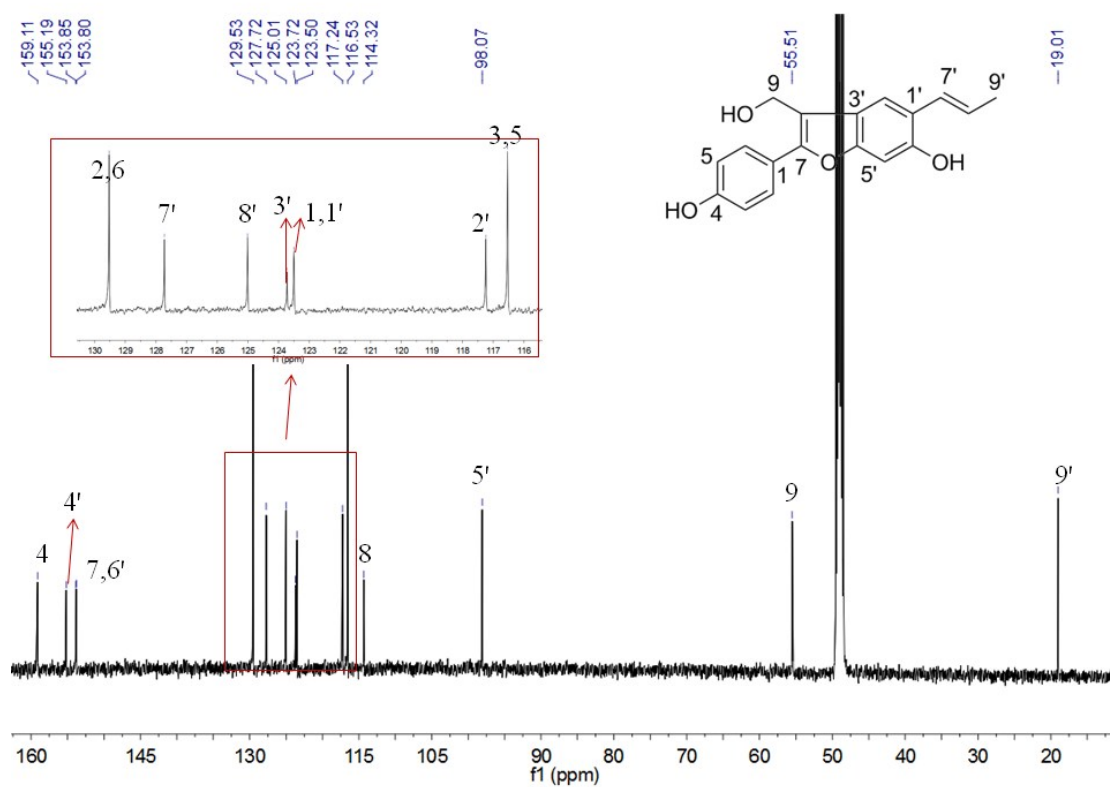

**Figure S4** HSQC spectrum of **1**

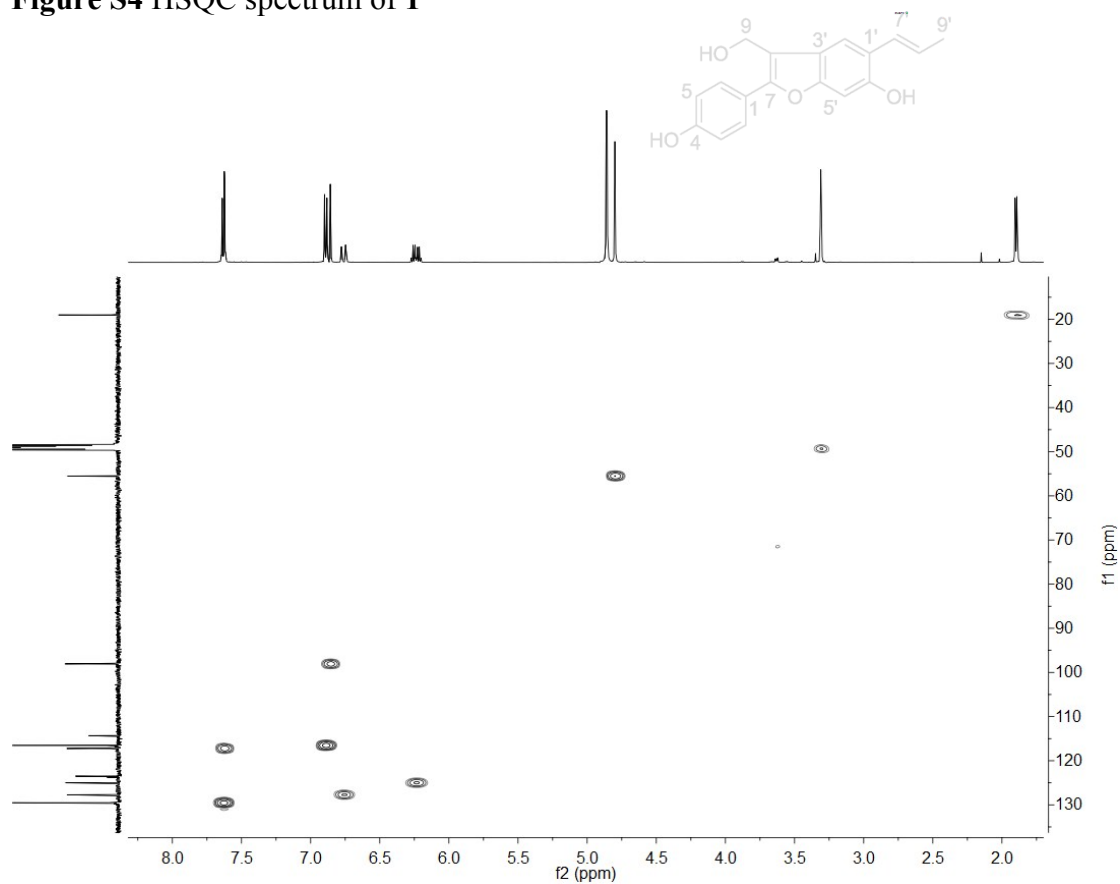

Figure S5 COSY spectrum of 1

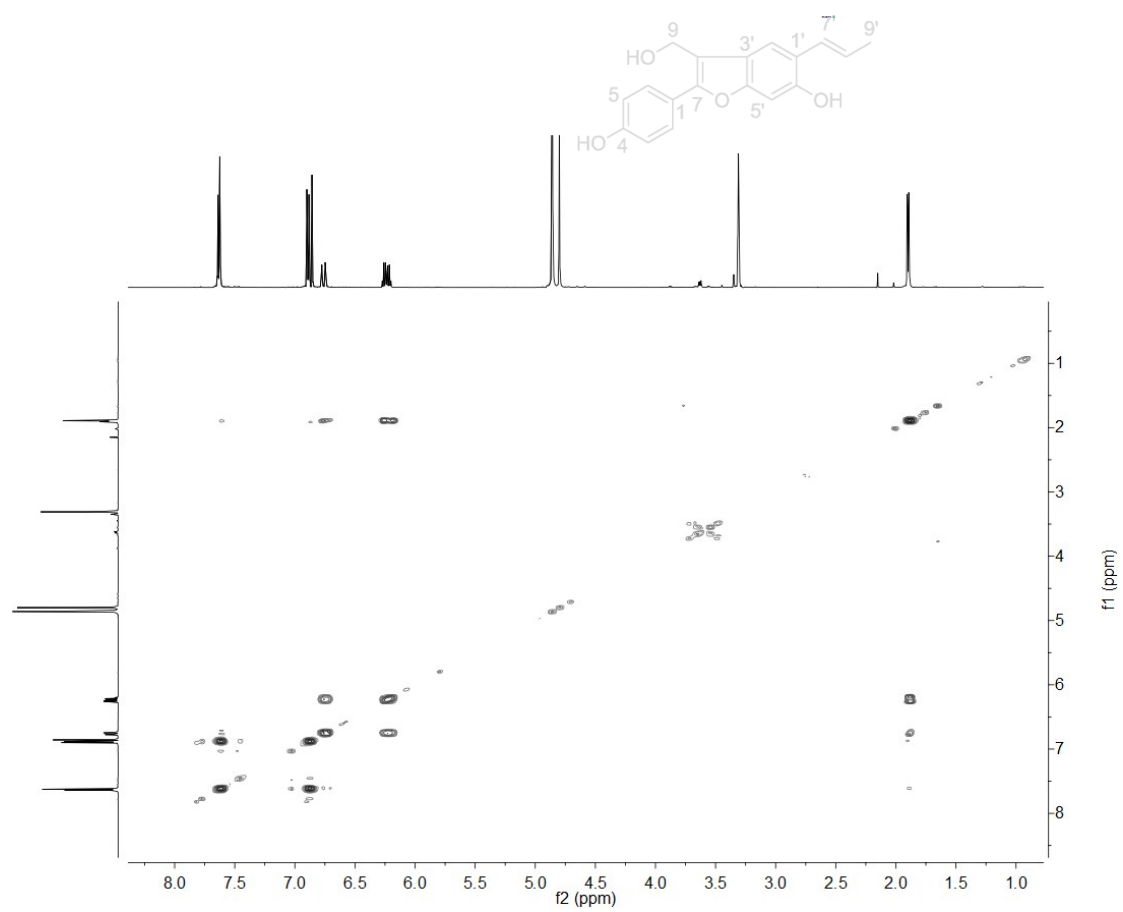

**Figure S6** HMBC spectrum of **1**

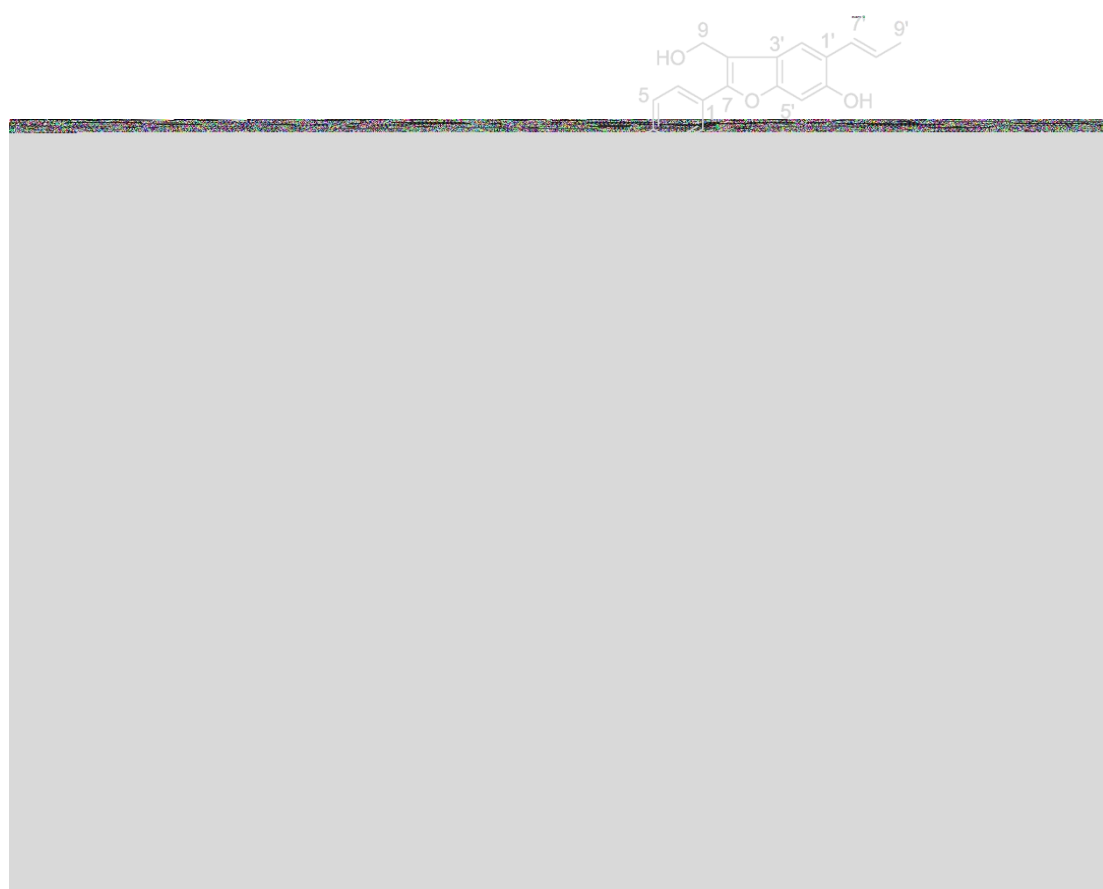

**Figure S7** IR spectrum of **1**

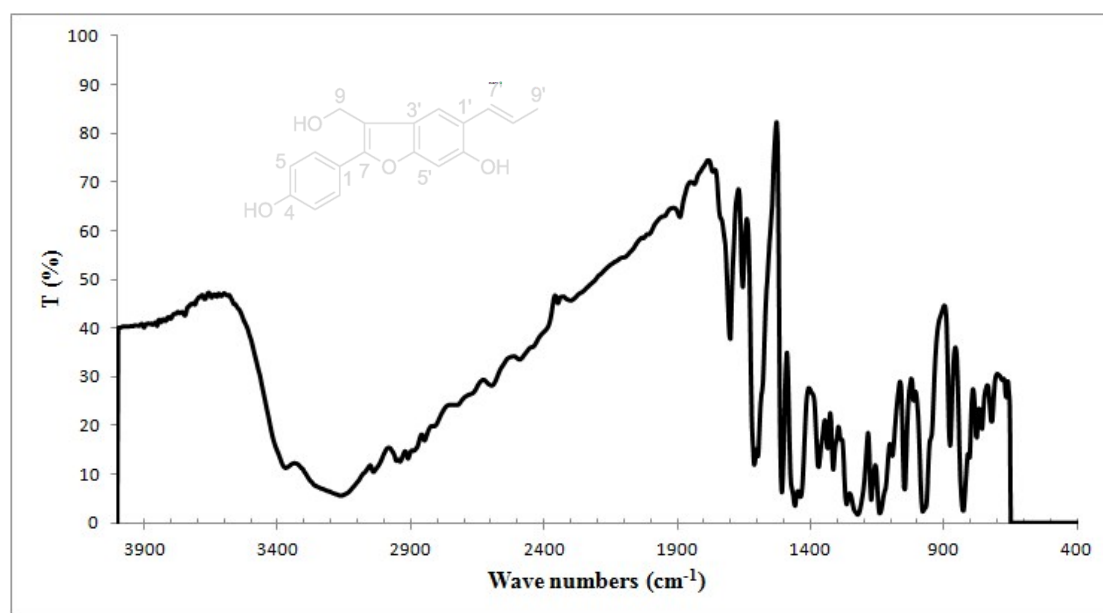

Figure S8 UV spectrum of 1

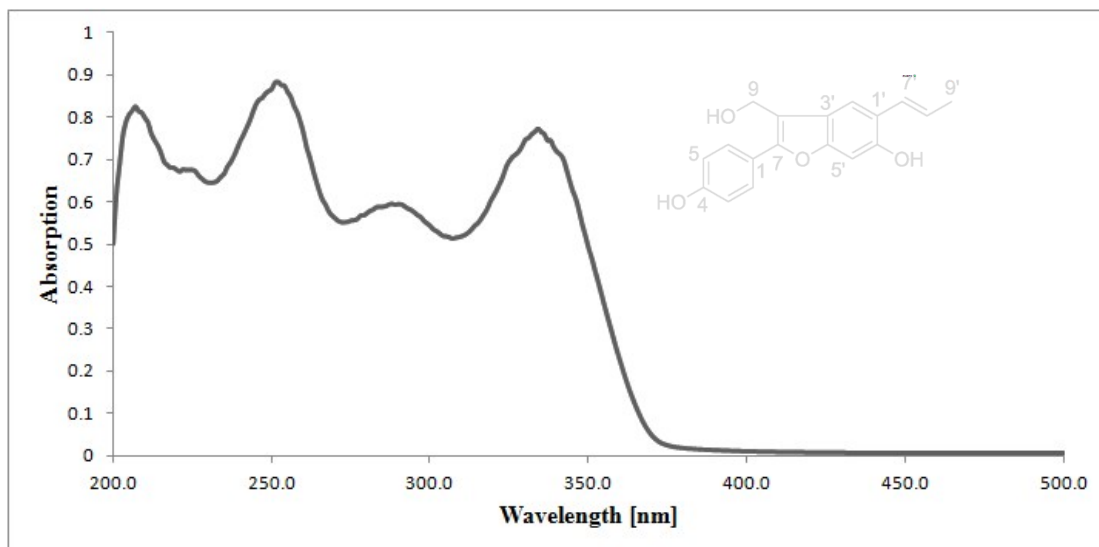

Figure S9 HRESIMS spectrum of 2

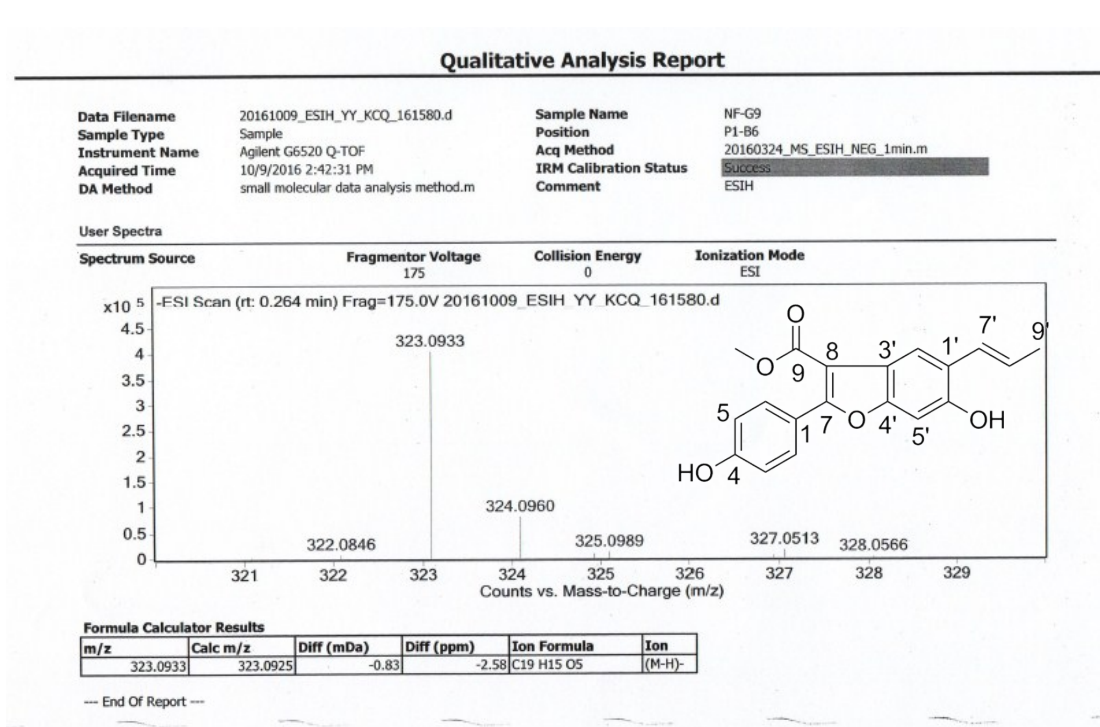



**Figure S10**  $^1\text{H}$  NMR spectrum (600 MHz,  $\text{CD}_3\text{OD}$ ) of **2**

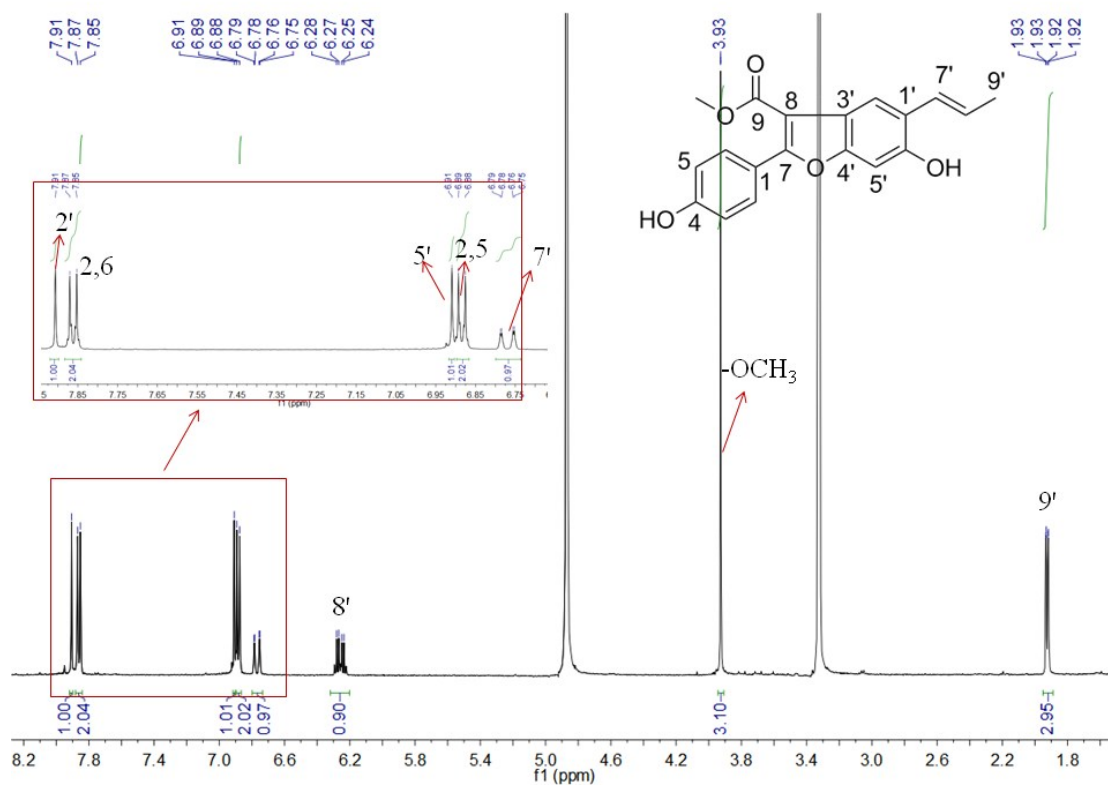

**Figure S11**  $^{13}\text{C}$  NMR spectrum (150 MHz,  $\text{CD}_3\text{OD}$ ) of **2**

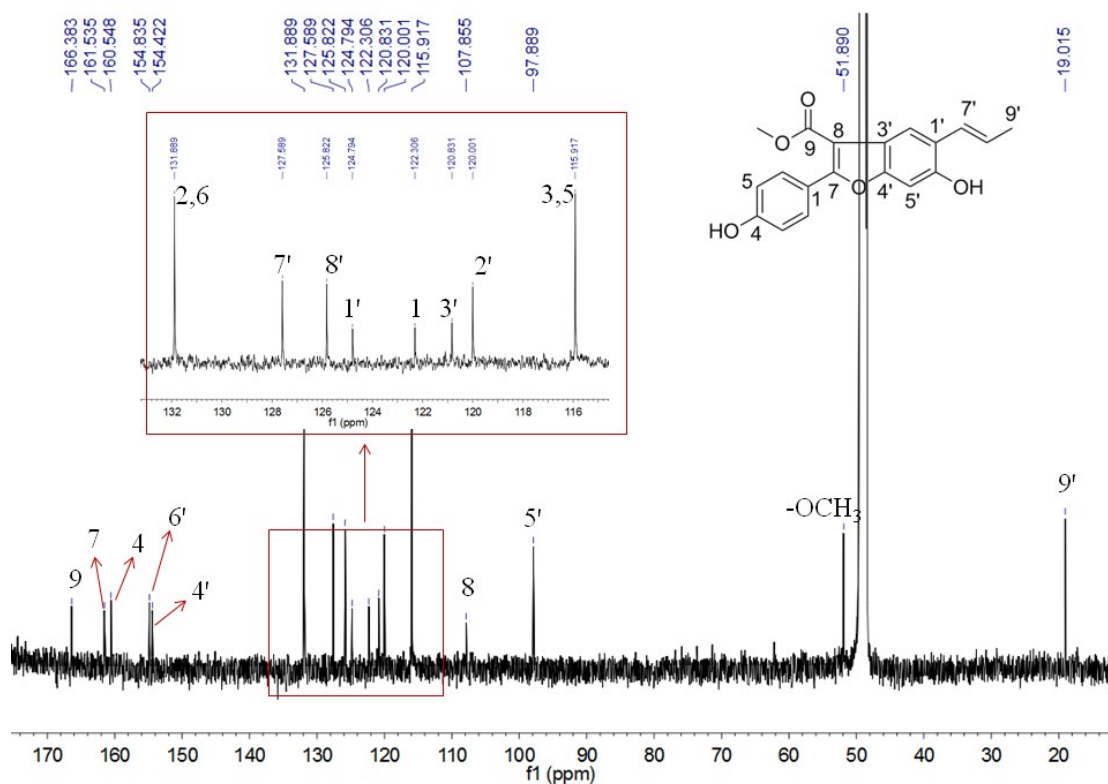

Figure S12 HSQC spectrum of **2**

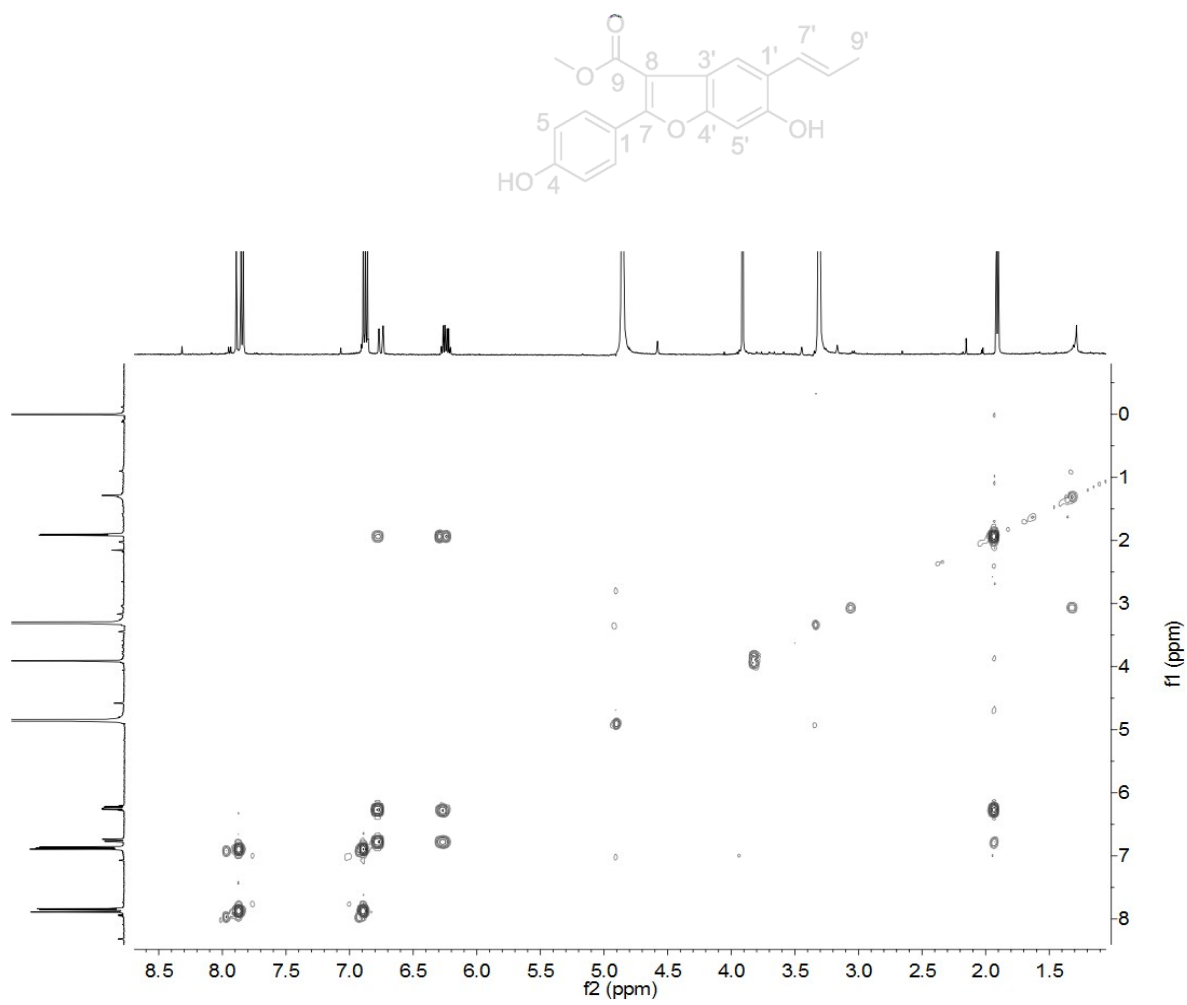

**Figure S13** COSY spectrum of **2**

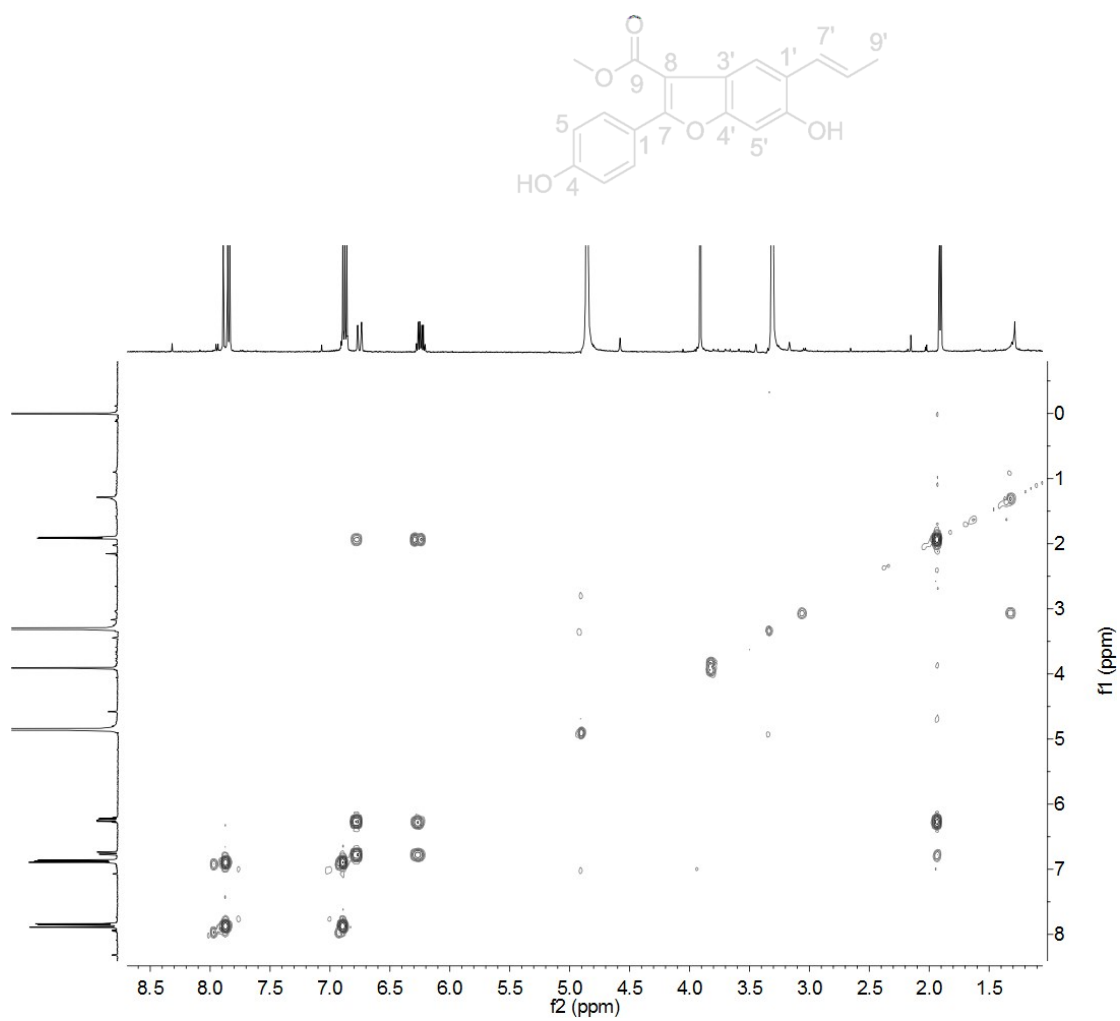

Figure S14 HMBC spectrum of 2

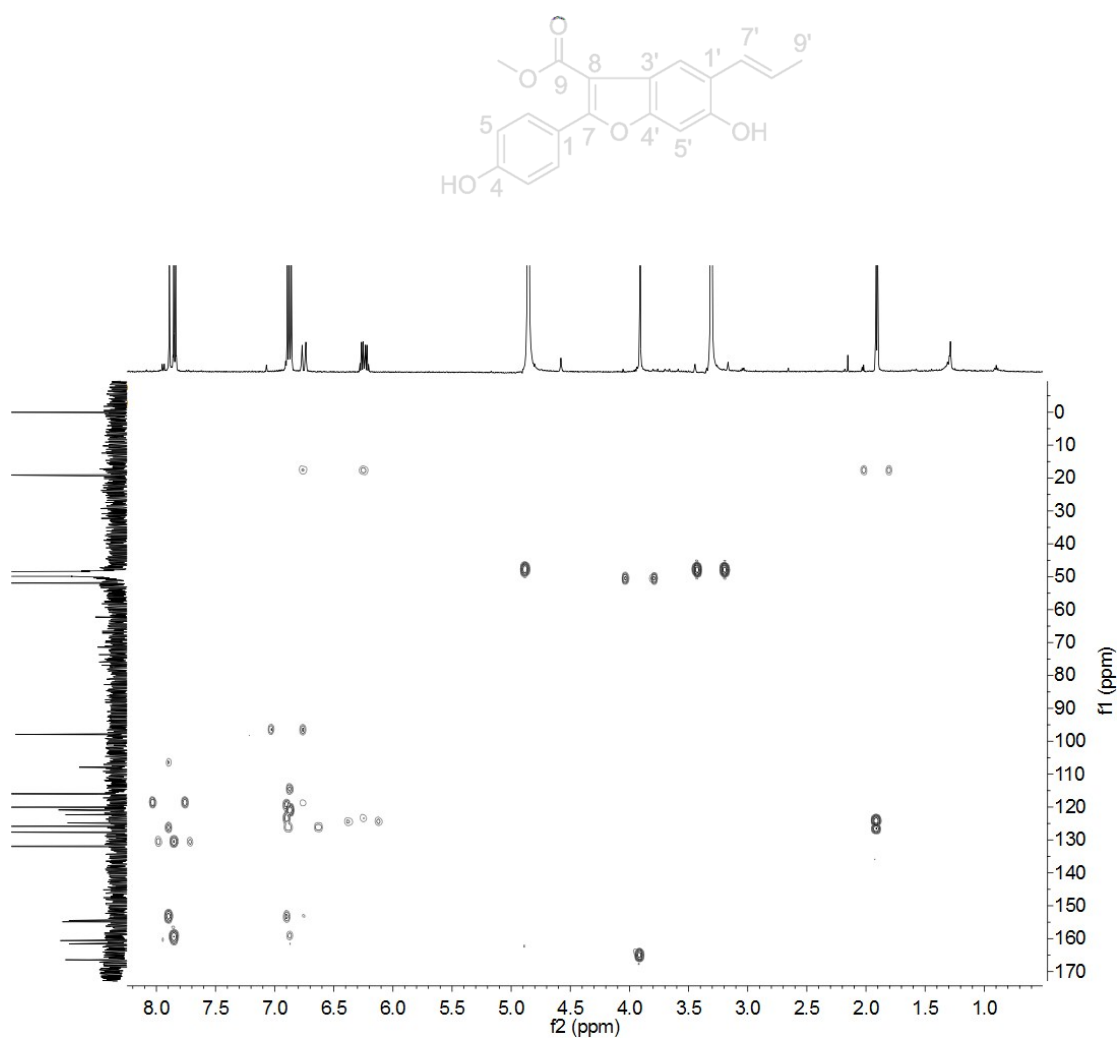

Figure S15 IR spectrum of 2

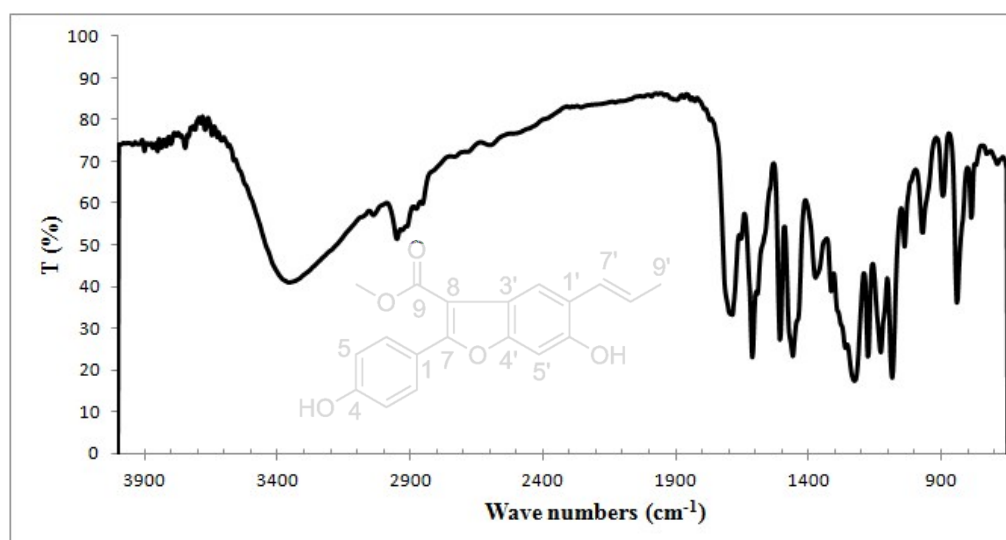

Figure S16 UV spectrum of 2

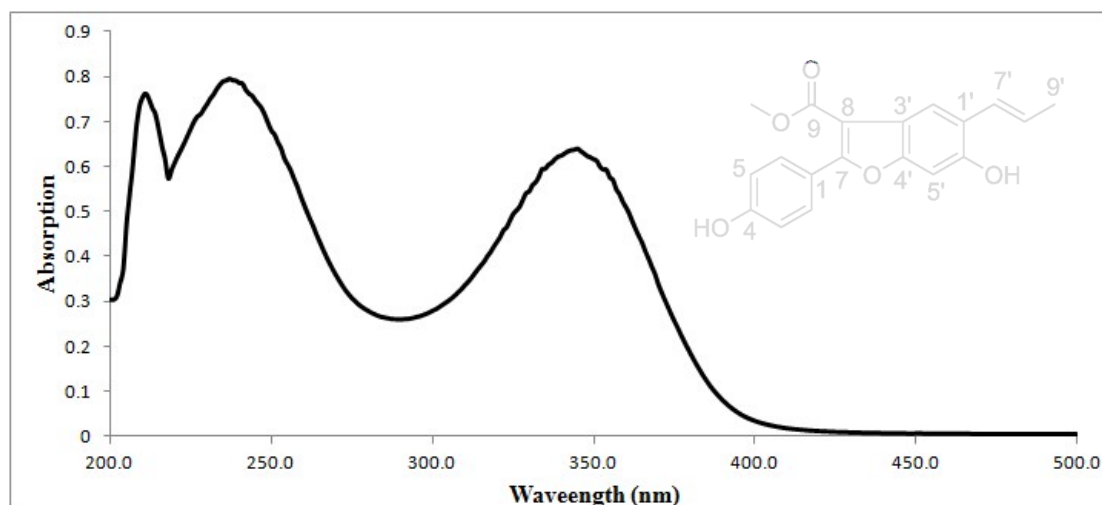

Figure S17 HRESIMS spectrum of 3

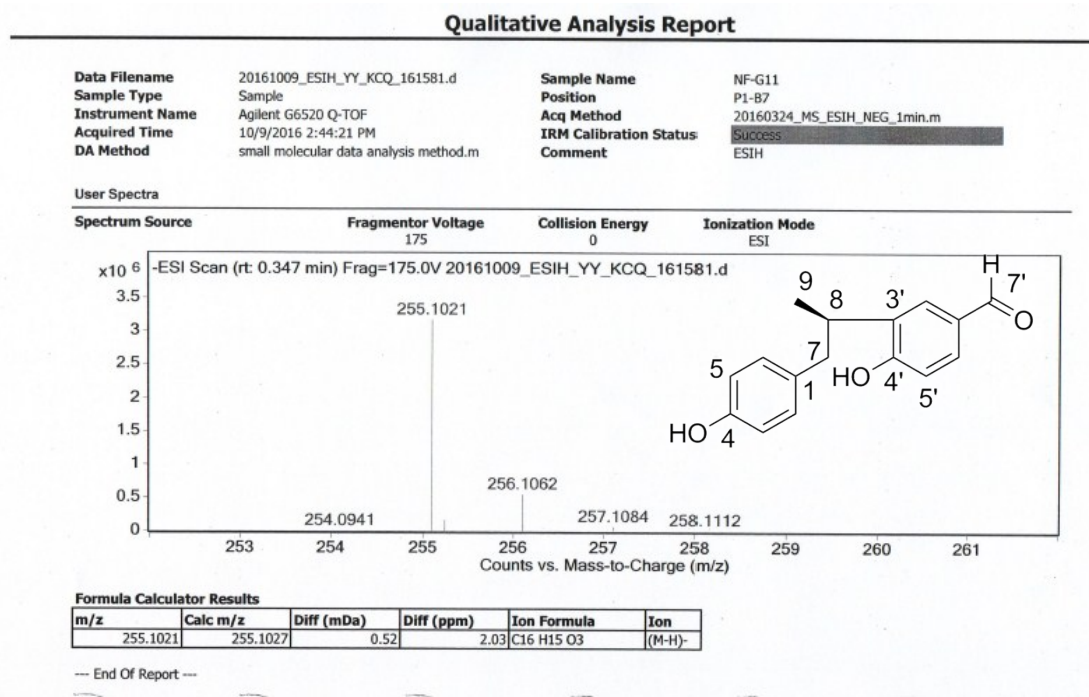

**Figure S18**  $^1\text{H}$  NMR spectrum (600 MHz,  $\text{CD}_3\text{OD}$ ) of **3**

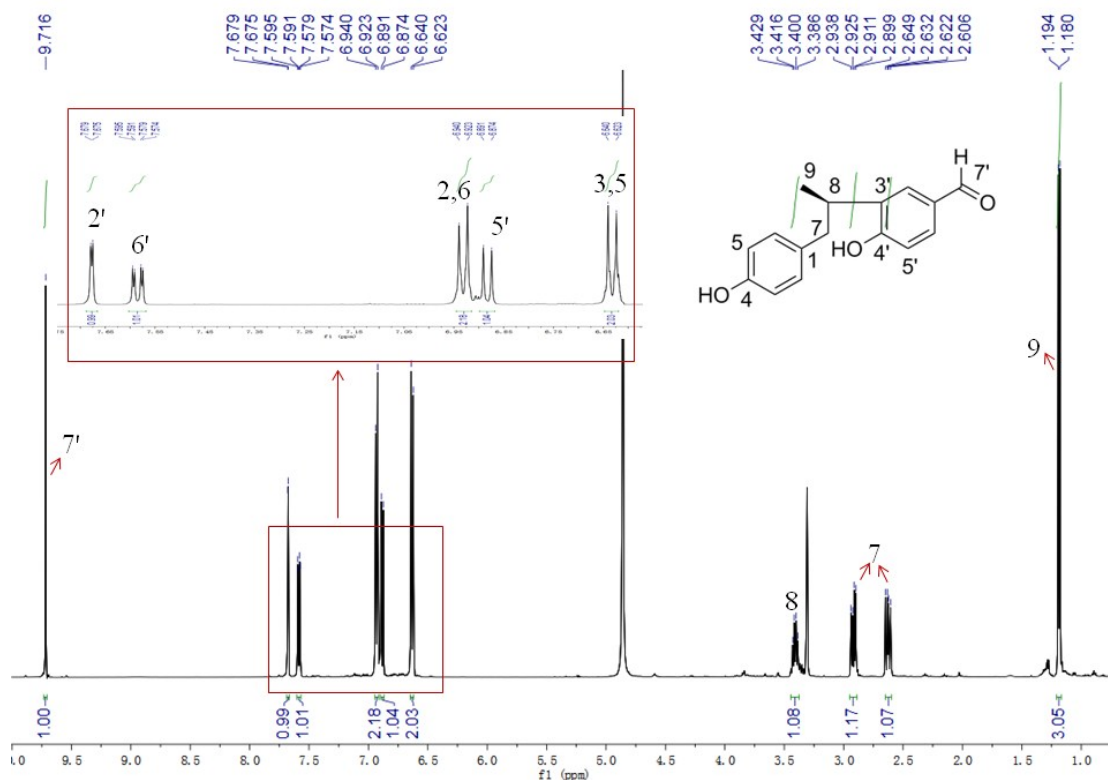

**Figure S19**  $^{13}\text{C}$  NMR spectrum (150 MHz,  $\text{CD}_3\text{OD}$ ) of **3**

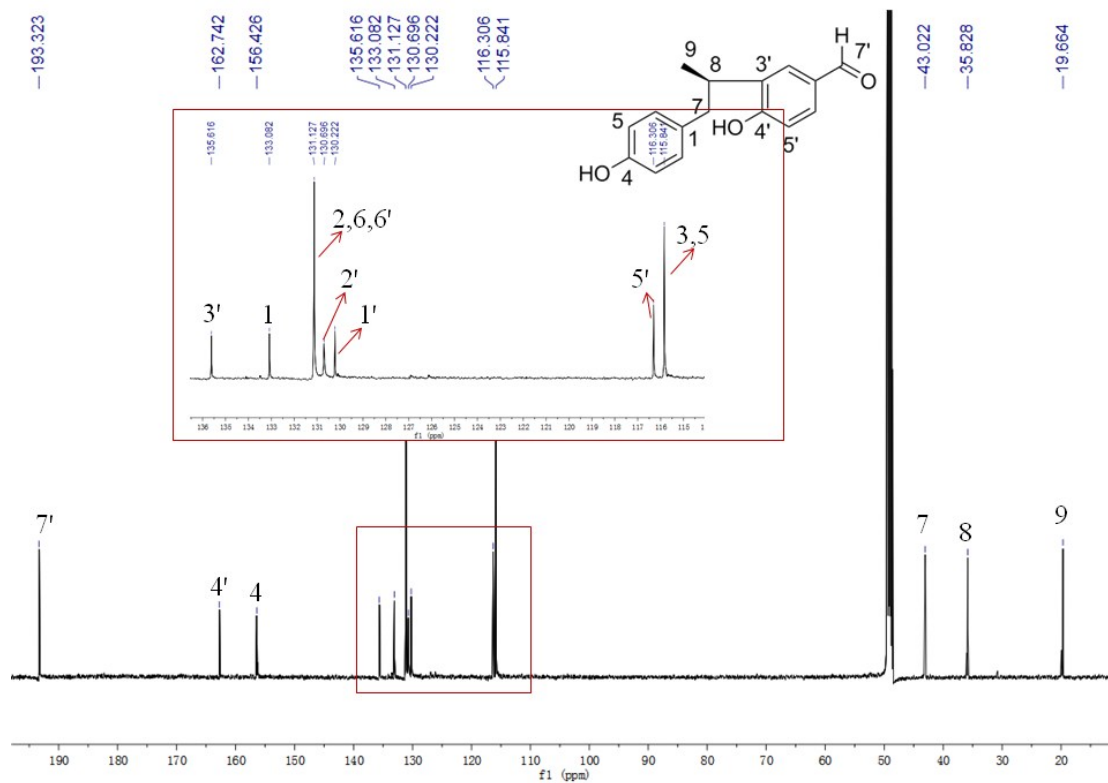

Figure S20 HSQC spectrum of **3**

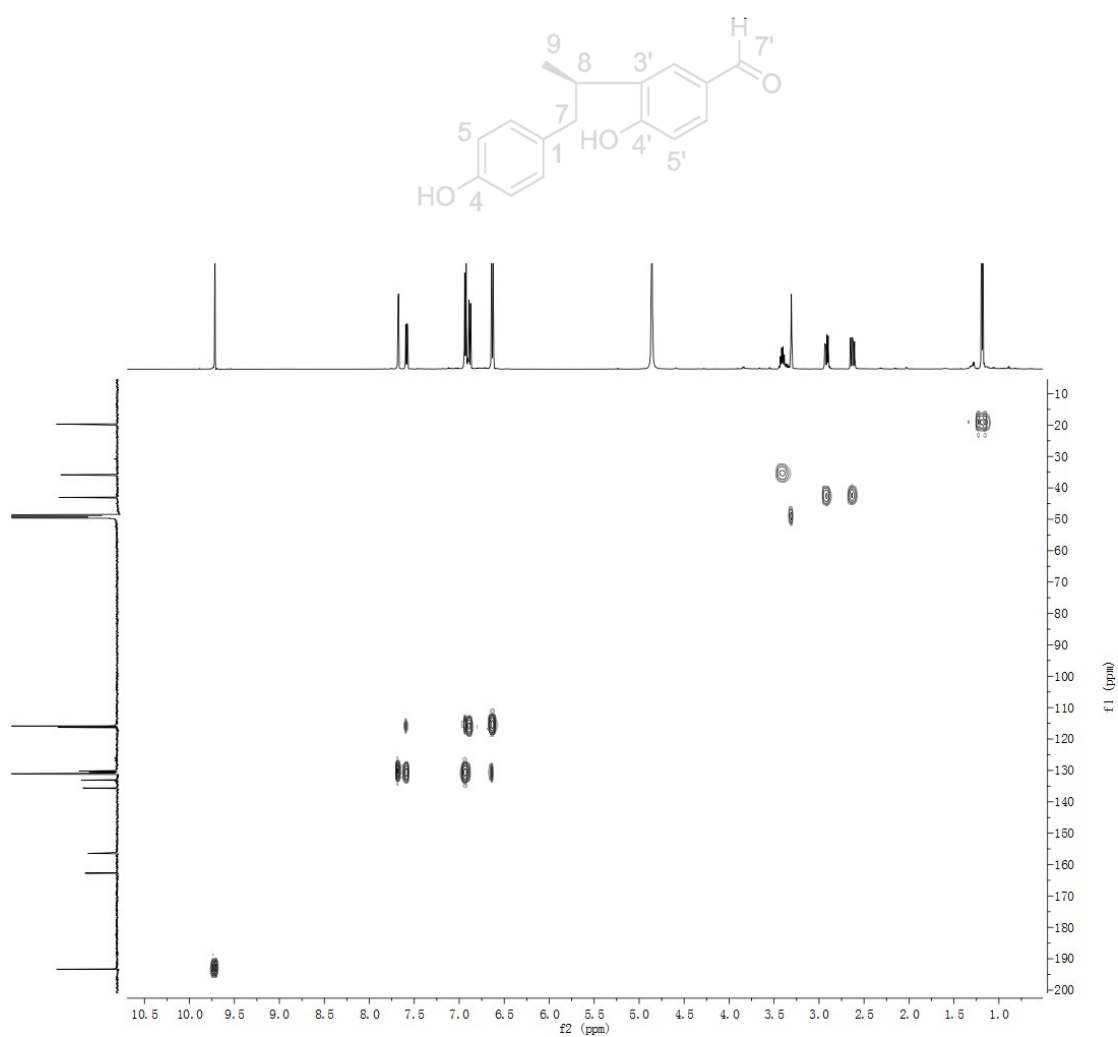

Figure S21  $^1\text{H}$ - $^1\text{H}$  COSY spectrum of **3**

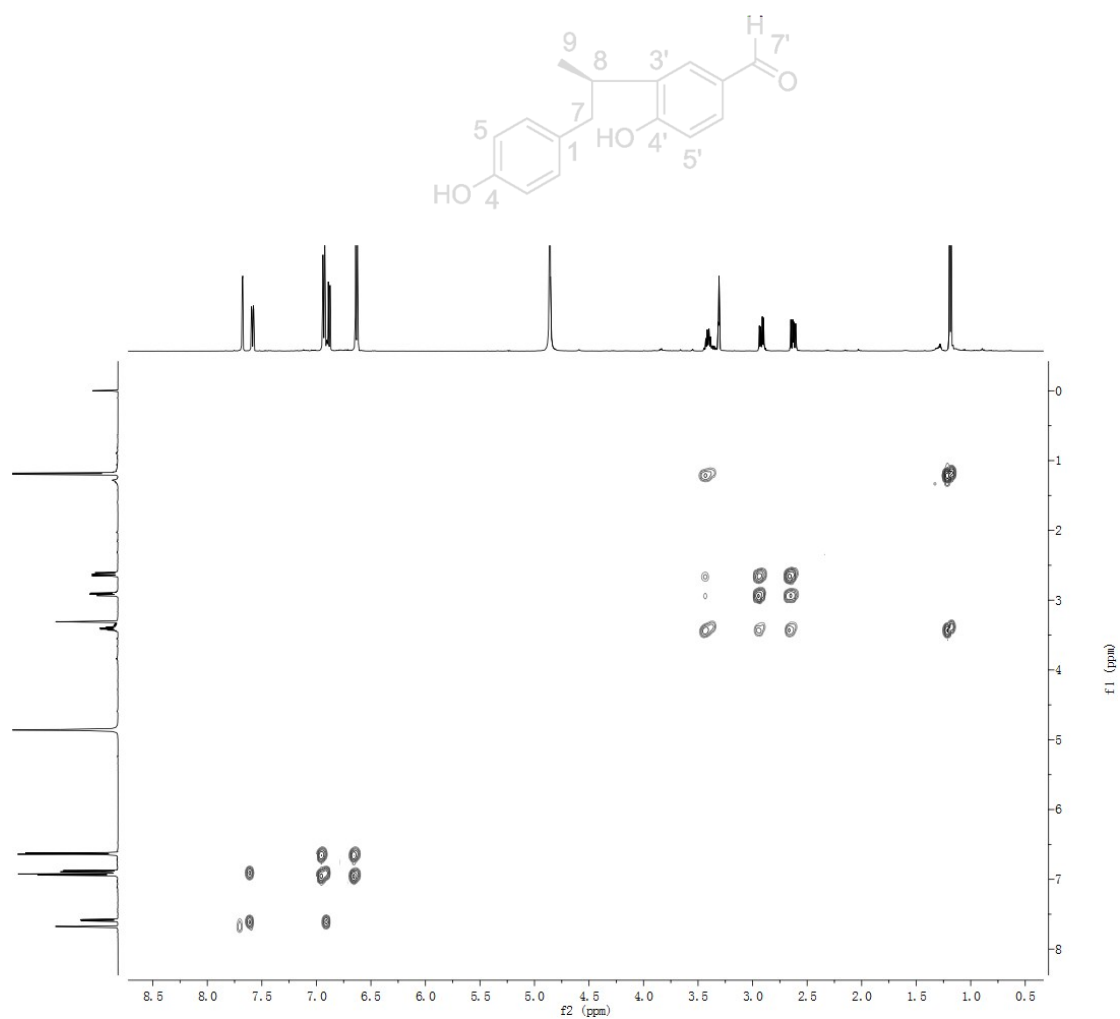



Figure S22 HMBC spectrum of **3**

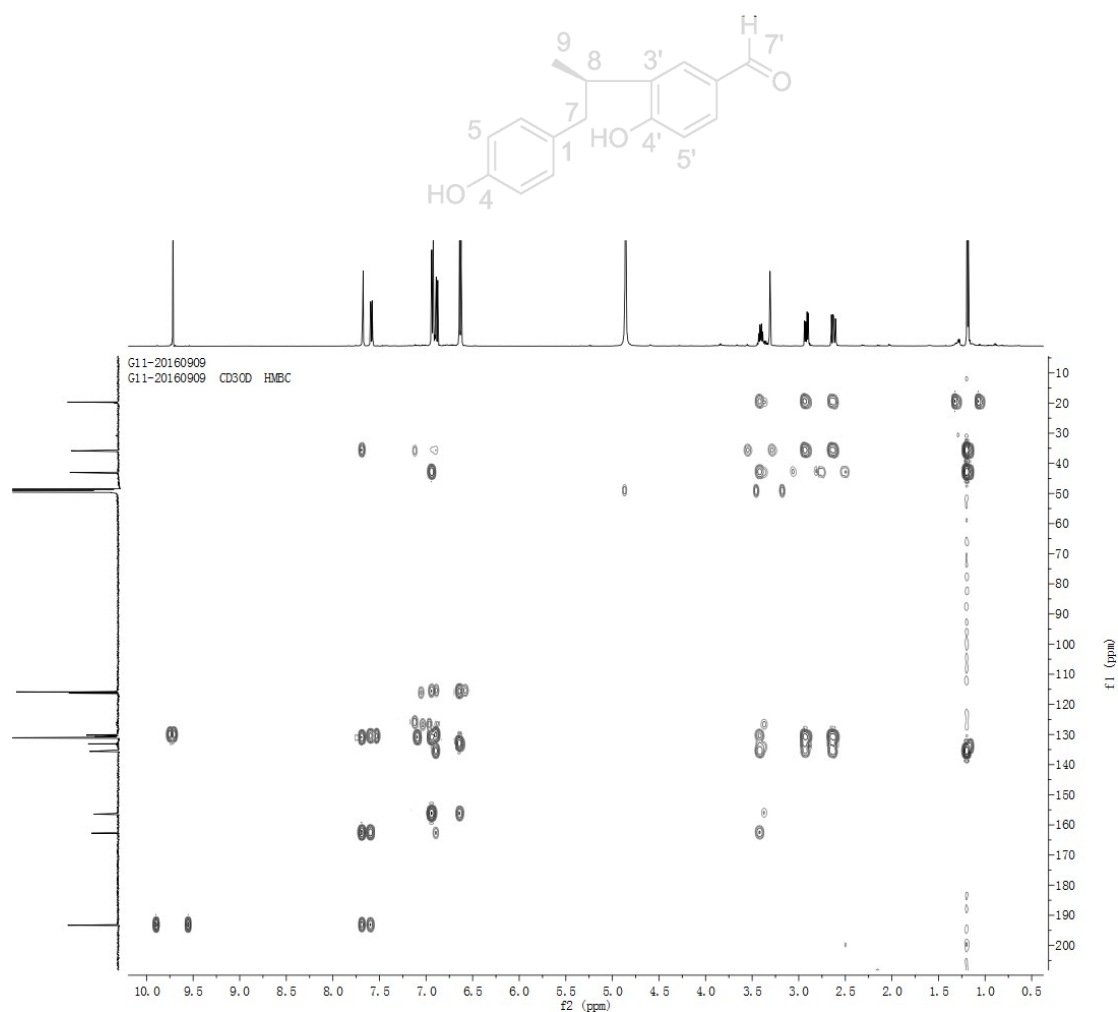

Figure S23 IR spectrum of **3**

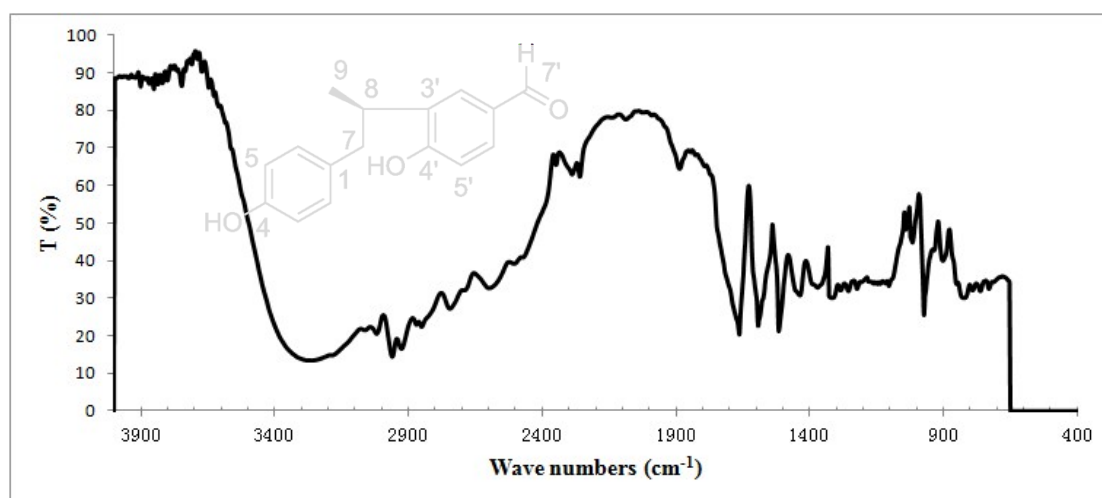

Figure S24 UV spectrum of 3

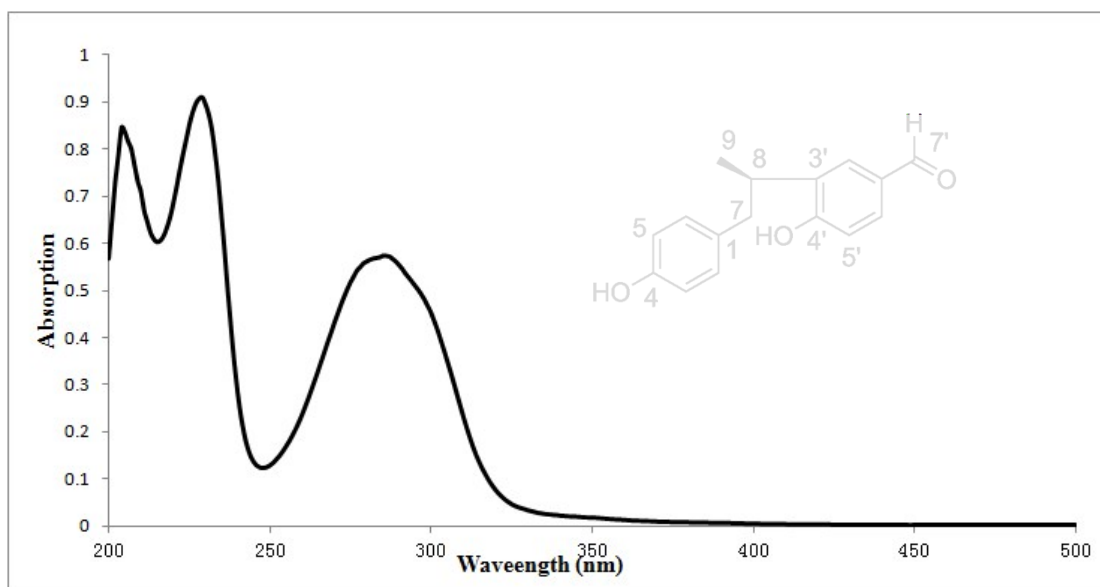

Figure S25 HRESIMS spectrum of 4

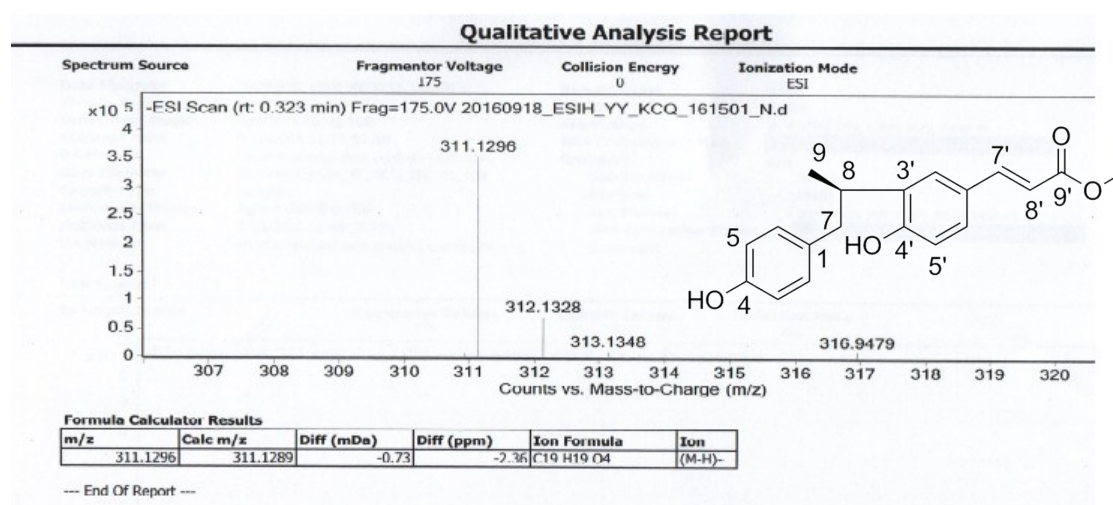

**Figure S26**  $^1\text{H}$  NMR spectrum (600 MHz,  $\text{CD}_3\text{OD}$ ) of **4**

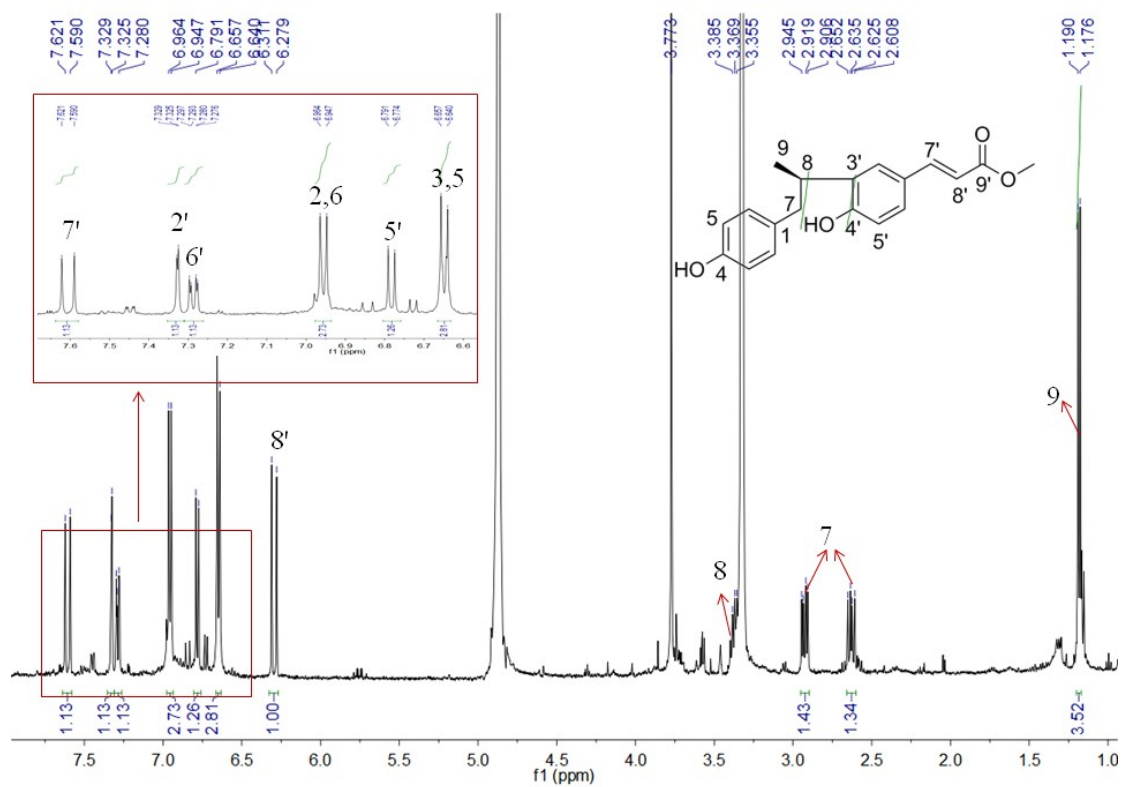

**Figure S27**  $^{13}\text{C}$  NMR spectrum (150 MHz,  $\text{CD}_3\text{OD}$ ) of **4**

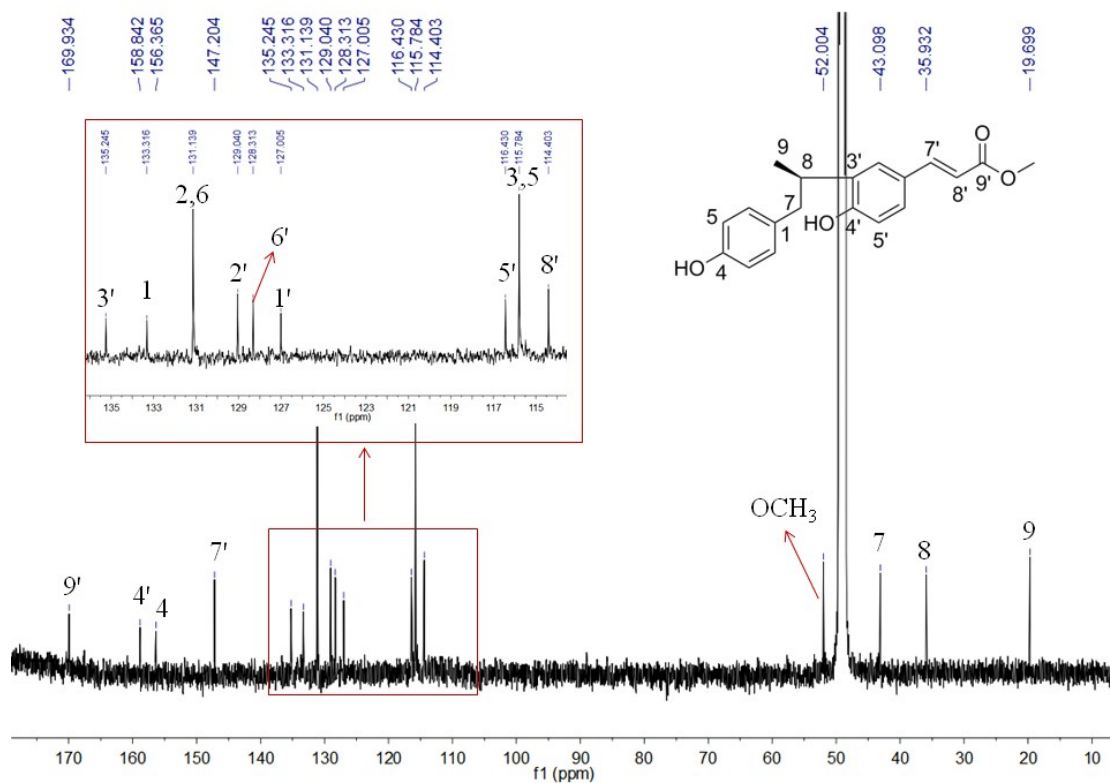

Figure S28 HSQC spectrum of **4**

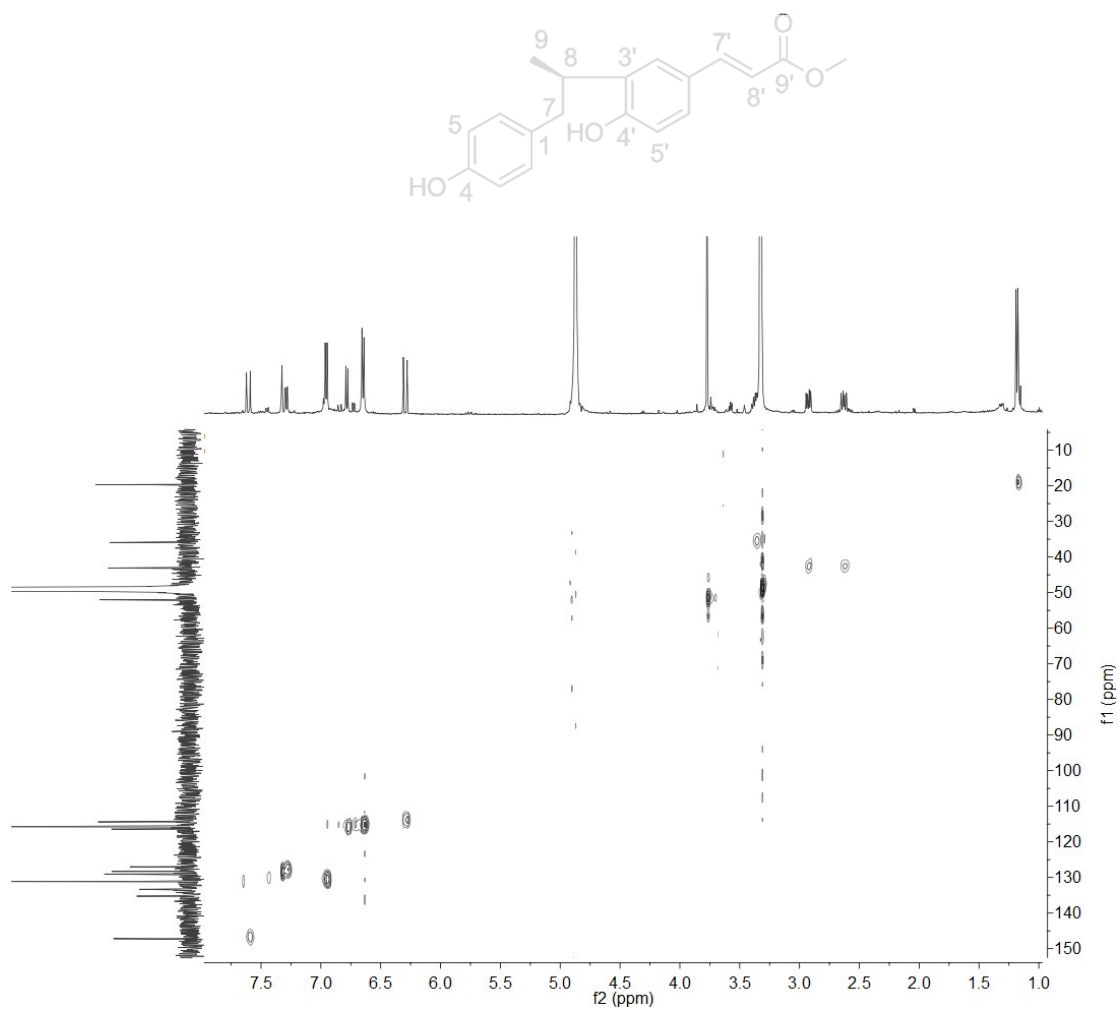

Figure S29 COSY spectrum of 4

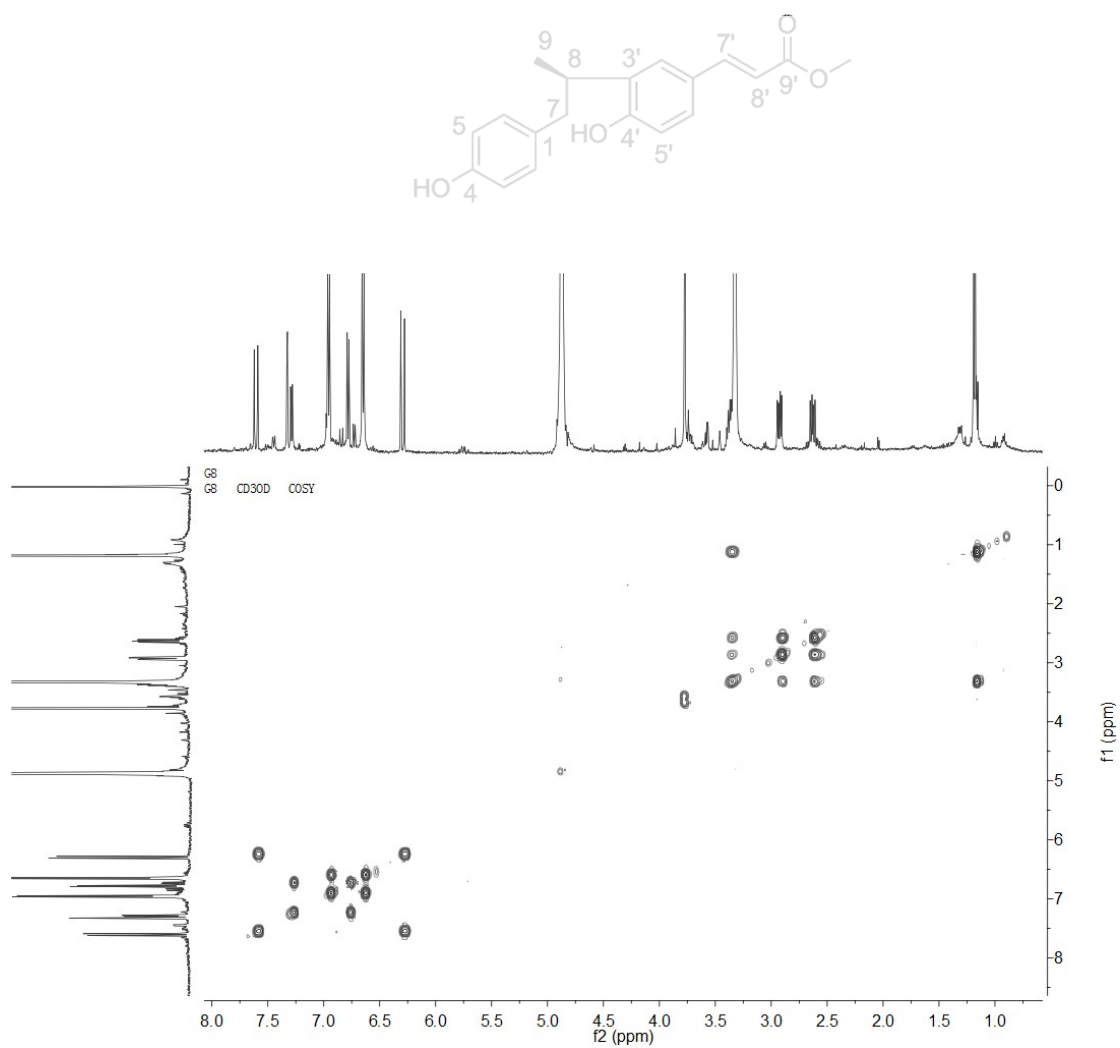

Figure S30 HMBC spectrum of 4

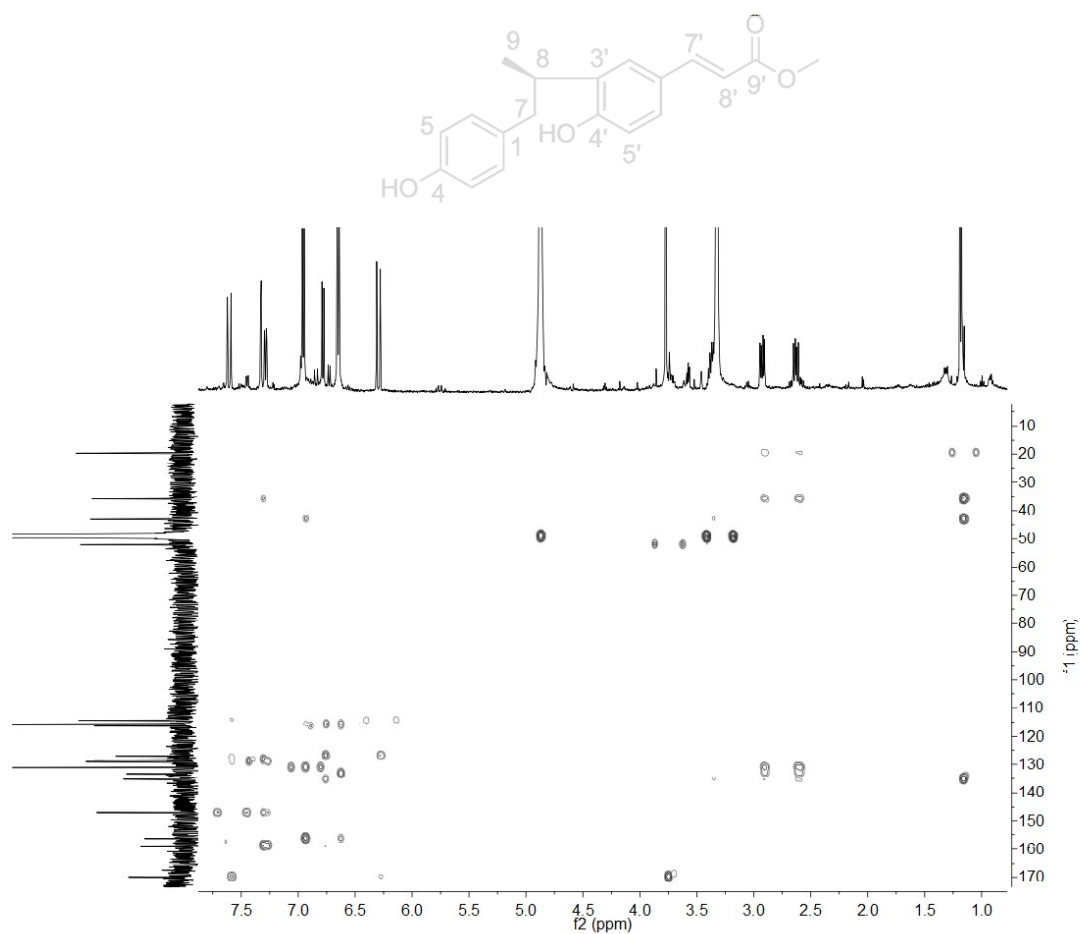

Figure S31 IR spectrum of 4

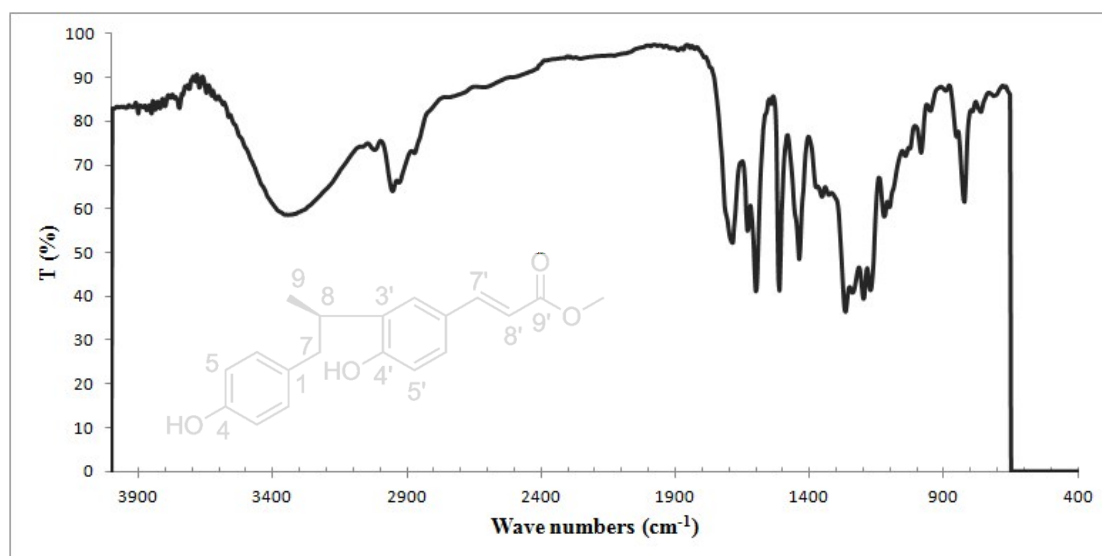

**Figure S32** UV spectrum of **4**

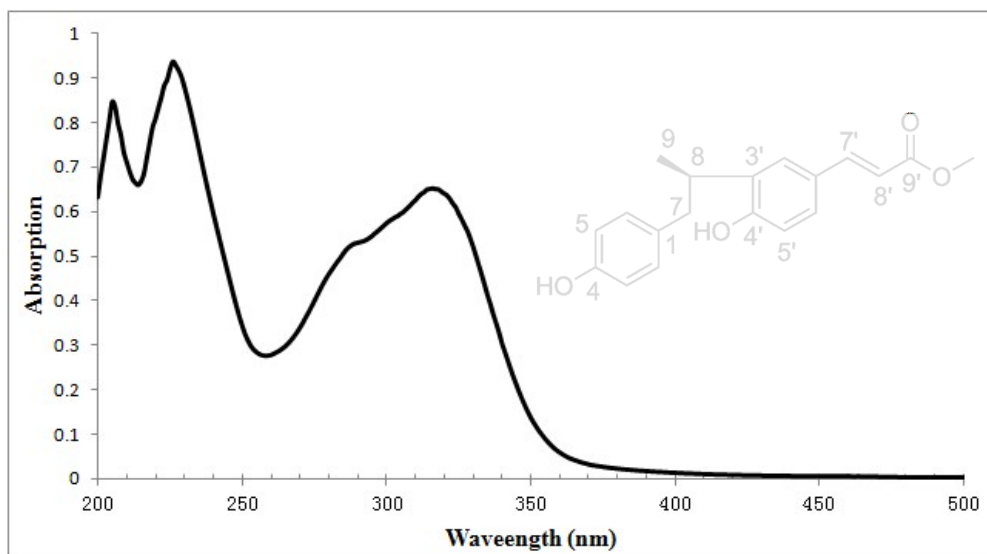

**Figure S33** HPLC chromatogram of **1**

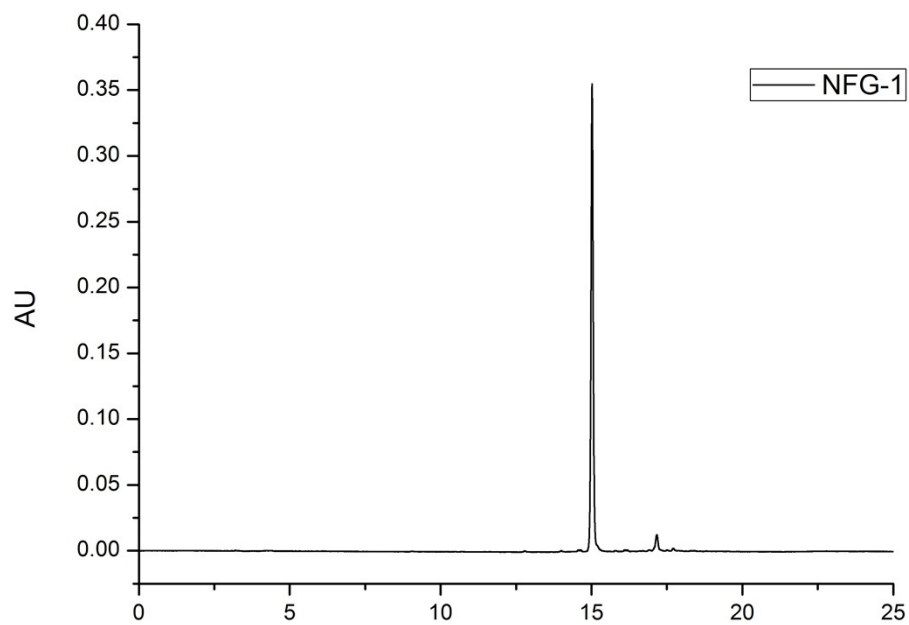

**Figure S34** HPLC chromatogram of **2**

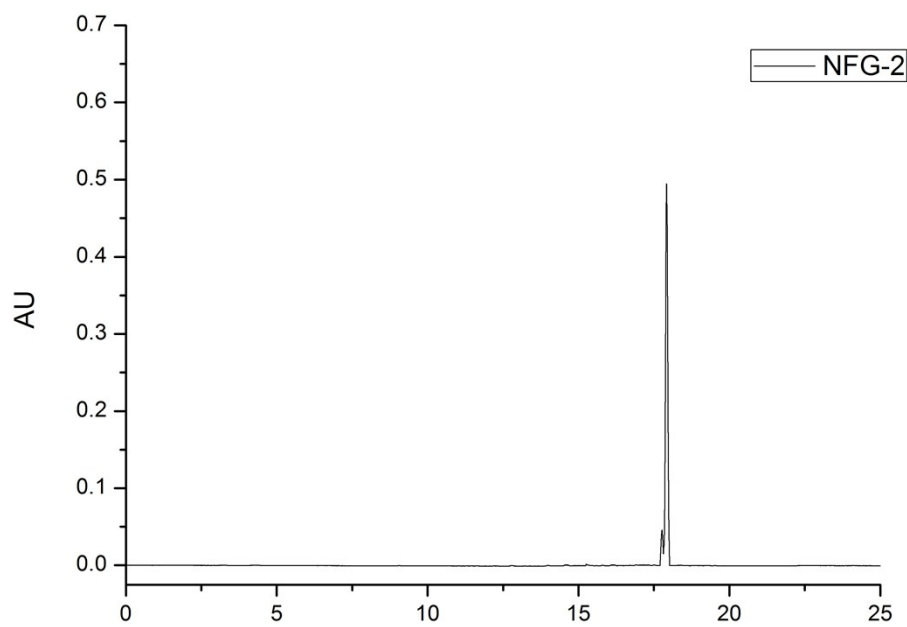

**Figure S35** HPLC chromatogram of **3**

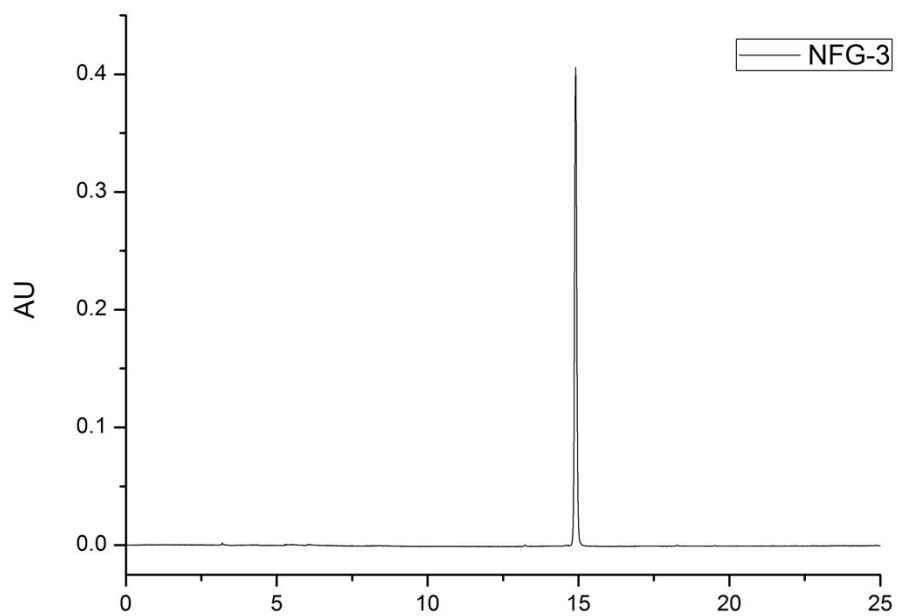



**Figure S36** HPLC chromatogram of 4

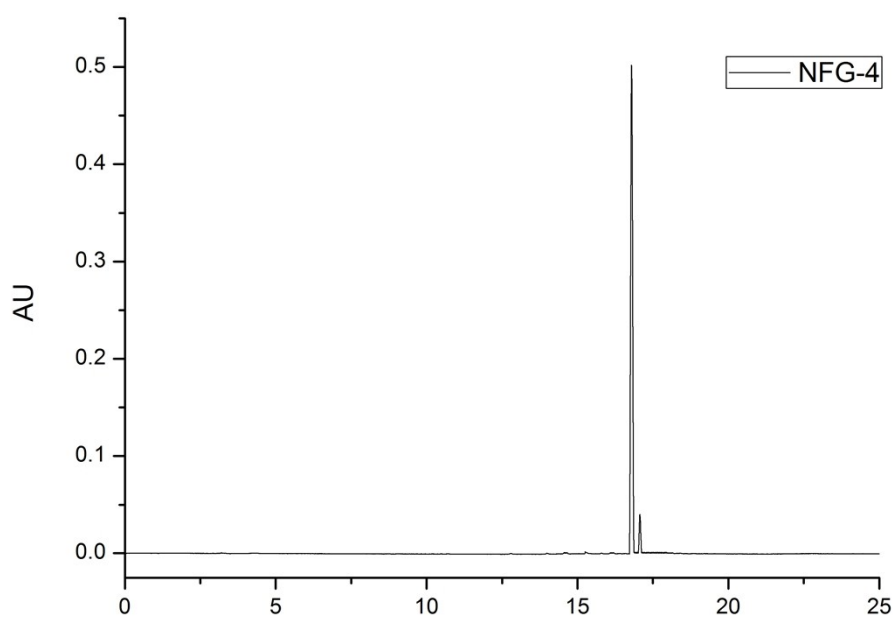

Supplement: c7ra09569d1.pdf [file c7ra09569d1.pdf]
